# Supplementary material for: Behavioral symptoms, depression symptoms, and medication use in Michigan nursing home residents with dementia during COVID‐19
Source: PubMed Central journal article supplement — J Am Geriatr Soc. 2022 Nov 8:10.1111/jgs.18116. doi: 10.1111/jgs.18116 (PMC9877723; doi:10.1111/jgs.18116), 2022-11-08
Supplement: JGS-9999-0-s001.pdf [file JGS-9999-0-s001.pdf]

## **Supplemental File**

### **Behavioral symptoms, depression symptoms, and medication use in Michigan nursing home residents with dementia during COVID-19**

Coe AB, Montoya A, Chang CH, Park PS, Bynum JPW, Shireman TI, Zhang T, McCreedy EM, Gerlach LB

#### **Table of Contents**

**Supplementary Table S1.** International Classification of Diseases - Clinical Modification - 10<sup>th</sup> Revision (ICD-CM-10) codes used to identify Alzheimer's disease and related dementias

**Supplementary Table S2.** Observed percentage of behavioral symptoms (Agitated Reactive Behavior Scale (ARBS)  $\geq 1$ ) and depression symptoms (Patient Health Questionnaire-9 (PHQ-9)  $\geq 10$ , indicating at least moderate depression) among Michigan long-stay nursing home residents with Alzheimer's disease and related dementias, January 2018 – June 2021.

**Supplementary Table S3.** Observed percentage of antipsychotic, antianxiety, antidepressant, hypnotic, and opioid medication use among Michigan long-stay nursing home residents with Alzheimer's disease and related dementias, January 2018 – June 2021.

**Supplementary Table S1.** International Classification of Diseases - Clinical Modification - 10<sup>th</sup> Revision (ICD-CM-10) codes used to identify Alzheimer's disease and related dementias

|                                                  | <b>ICD-CM-10 codes</b>                                                                                                                                    |
|--------------------------------------------------|-----------------------------------------------------------------------------------------------------------------------------------------------------------|
| <b>Alzheimer's disease and related dementias</b> | F01.50, F01.51, F02.80, F02.81, F03.90, F03.91, G31.01, G31.09, R41.81, F06.1, F06.8, G13.8, G30.0, G30.1, G30.8, G30.9, G31.1, G31.2, F04, F05, G94, R54 |

**Supplementary Table S2.** Observed percentage of behavioral symptoms (Agitated Reactive Behavior Scale (ARBS)  $\geq 1$ ) and depression symptoms (Patient Health Questionnaire-9 (PHQ-9)  $\geq 10$ , indicating at least moderate depression) among Michigan long-stay nursing home residents with Alzheimer’s disease and related dementias, January 2018 – June 2021.

| <b>Time period</b> | <b>ARBS <math>\geq 1</math></b> | <b>PHQ-9 <math>\geq 10</math></b> |
|--------------------|---------------------------------|-----------------------------------|
| <b>Year- month</b> | <b>%</b>                        | <b>%</b>                          |
| 2018 - Jan         | 20.1%                           | 3.1%                              |
| 2018 - Feb         | 20.3%                           | 3.2%                              |
| 2018 - Mar         | 20.2%                           | 2.8%                              |
| 2018 - Apr         | 19.9%                           | 3.1%                              |
| 2018 - May         | 20.2%                           | 3.1%                              |
| 2018 - Jun         | 19.3%                           | 2.9%                              |
| 2018 - Jul         | 20.3%                           | 2.9%                              |
| 2018 - Aug         | 20.2%                           | 3.1%                              |
| 2018 - Sep         | 19.8%                           | 3.0%                              |
| 2018 - Oct         | 21.1%                           | 2.7%                              |
| 2018 - Nov         | 19.7%                           | 2.4%                              |
| 2018 - Dec         | 19.3%                           | 2.7%                              |
| 2019 - Jan         | 19.2%                           | 2.9%                              |
| 2019 - Feb         | 19.7%                           | 2.4%                              |
| 2019 - Mar         | 19.9%                           | 2.7%                              |
| 2019 - Apr         | 20.1%                           | 2.9%                              |
| 2019 - May         | 19.5%                           | 2.6%                              |
| 2019 - Jun         | 20.4%                           | 2.9%                              |
| 2019 - Jul         | 21.5%                           | 2.7%                              |
| 2019 - Aug         | 21.2%                           | 2.8%                              |
| 2019 - Sep         | 21.2%                           | 3.0%                              |
| 2019 - Oct         | 20.3%                           | 3.4%                              |
| 2019 - Nov         | 19.9%                           | 3.3%                              |
| 2019 - Dec         | 19.3%                           | 2.9%                              |
| 2020 - Jan         | 19.2%                           | 3.6%                              |
| 2020 - Feb         | 19.1%                           | 3.3%                              |
| 2020 - Mar         | 18.6%                           | 3.2%                              |
| 2020 - Apr         | 19.0%                           | 3.4%                              |
| 2020 - May         | 19.5%                           | 3.8%                              |
| 2020 - Jun         | 18.7%                           | 3.3%                              |
| 2020 - Jul         | 19.0%                           | 3.2%                              |
| 2020 - Aug         | 19.5%                           | 3.6%                              |
| 2020 - Sep         | 19.7%                           | 3.8%                              |
| 2020 - Oct         | 19.7%                           | 3.5%                              |
| 2020 - Nov         | 20.3%                           | 4.0%                              |
| 2020 - Dec         | 20.9%                           | 4.5%                              |
| 2021 - Jan         | 19.7%                           | 3.9%                              |
| 2021 - Feb         | 19.5%                           | 3.5%                              |
| 2021 - Mar         | 20.3%                           | 3.9%                              |
| 2021 - Apr         | 19.5%                           | 3.5%                              |
| 2021 - May         | 18.5%                           | 3.7%                              |
| 2021 - Jun         | 19.7%                           | 4.2%                              |

**Supplementary Table S3.** Observed percentage of antipsychotic, antianxiety, antidepressant, hypnotic, and opioid medication use among Michigan long-stay nursing home residents with Alzheimer’s disease and related dementias, January 2018 – June 2021.

| <b>Time period</b><br><b>Year- month</b> | <b>Medication class, % use</b> |                    |                       |                 |                           |
|------------------------------------------|--------------------------------|--------------------|-----------------------|-----------------|---------------------------|
|                                          | <b>Antipsychotic</b>           | <b>Antianxiety</b> | <b>Antidepressant</b> | <b>Hypnotic</b> | <b>Opioid<sup>a</sup></b> |
| 2018 - Jan                               | 14.8%                          | 19.7%              | 53.2%                 | 1.0%            |                           |
| 2018 - Feb                               | 15.0%                          | 19.8%              | 54.6%                 | 1.2%            |                           |
| 2018 - Mar                               | 14.5%                          | 19.4%              | 54.3%                 | 1.0%            | 30.4%                     |
| 2018 - Apr                               | 14.6%                          | 19.4%              | 53.8%                 | 1.0%            | 29.3%                     |
| 2018 - May                               | 15.3%                          | 19.8%              | 54.6%                 | 1.0%            | 29.9%                     |
| 2018 - Jun                               | 14.4%                          | 18.8%              | 54.3%                 | 0.9%            | 29.6%                     |
| 2018 - Jul                               | 15.4%                          | 19.6%              | 53.8%                 | 0.8%            | 28.0%                     |
| 2018 - Aug                               | 15.6%                          | 19.2%              | 54.4%                 | 0.9%            | 28.8%                     |
| 2018 - Sep                               | 15.0%                          | 18.4%              | 54.7%                 | 0.9%            | 28.1%                     |
| 2018 - Oct                               | 15.4%                          | 18.7%              | 54.8%                 | 0.7%            | 27.6%                     |
| 2018 - Nov                               | 14.9%                          | 18.5%              | 55.2%                 | 0.9%            | 28.4%                     |
| 2018 - Dec                               | 14.6%                          | 18.7%              | 56.3%                 | 0.7%            | 28.7%                     |
| 2019 - Jan                               | 15.5%                          | 18.5%              | 53.9%                 | 0.8%            | 27.1%                     |
| 2019 - Feb                               | 14.9%                          | 18.5%              | 53.6%                 | 0.9%            | 27.2%                     |
| 2019 - Mar                               | 15.3%                          | 18.0%              | 55.6%                 | 0.6%            | 27.7%                     |
| 2019 - Apr                               | 15.2%                          | 18.2%              | 54.1%                 | 0.8%            | 27.4%                     |
| 2019 - May                               | 14.5%                          | 17.8%              | 53.3%                 | 0.6%            | 26.9%                     |
| 2019 - Jun                               | 14.5%                          | 17.6%              | 53.2%                 | 0.4%            | 26.7%                     |
| 2019 - Jul                               | 14.8%                          | 18.2%              | 54.3%                 | 0.8%            | 26.9%                     |
| 2019 - Aug                               | 14.9%                          | 18.4%              | 54.0%                 | 0.6%            | 26.5%                     |
| 2019 - Sep                               | 15.3%                          | 17.5%              | 53.7%                 | 0.5%            | 27.0%                     |
| 2019 - Oct                               | 14.6%                          | 18.8%              | 53.5%                 | 0.6%            | 26.1%                     |
| 2019 - Nov                               | 15.1%                          | 18.1%              | 53.7%                 | 0.7%            | 25.4%                     |
| 2019 - Dec                               | 14.3%                          | 17.4%              | 54.2%                 | 0.6%            | 26.0%                     |
| 2020 - Jan                               | 14.2%                          | 18.1%              | 53.2%                 | 0.7%            | 26.1%                     |
| 2020 - Feb                               | 14.2%                          | 16.9%              | 52.4%                 | 0.6%            | 24.5%                     |
| 2020 - Mar                               | 14.3%                          | 16.8%              | 52.9%                 | 0.4%            | 24.5%                     |
| 2020 - Apr                               | 14.4%                          | 17.9%              | 53.4%                 | 0.6%            | 23.9%                     |
| 2020 - May                               | 14.8%                          | 17.3%              | 52.1%                 | 0.3%            | 23.5%                     |
| 2020 - Jun                               | 14.9%                          | 16.9%              | 52.6%                 | 0.4%            | 24.9%                     |
| 2020 - Jul                               | 14.8%                          | 18.6%              | 54.4%                 | 0.6%            | 25.0%                     |
| 2020 - Aug                               | 15.0%                          | 17.6%              | 53.7%                 | 0.5%            | 24.1%                     |
| 2020 - Sep                               | 15.8%                          | 18.9%              | 55.7%                 | 0.5%            | 24.9%                     |
| 2020 - Oct                               | 15.4%                          | 19.2%              | 56.4%                 | 0.6%            | 25.6%                     |
| 2020 - Nov                               | 15.2%                          | 18.2%              | 55.5%                 | 0.6%            | 24.3%                     |
| 2020 - Dec                               | 15.9%                          | 18.8%              | 56.2%                 | 0.6%            | 26.0%                     |
| 2021 - Jan                               | 14.8%                          | 17.3%              | 56.0%                 | 0.5%            | 24.0%                     |
| 2021 - Feb                               | 14.8%                          | 17.9%              | 55.0%                 | 0.5%            | 23.1%                     |
| 2021 - Mar                               | 15.5%                          | 18.7%              | 57.1%                 | 0.3%            | 25.3%                     |
| 2021 - Apr                               | 15.6%                          | 18.2%              | 58.4%                 | 0.6%            | 25.2%                     |
| 2021 - May                               | 15.3%                          | 18.2%              | 56.8%                 | 0.5%            | 23.3%                     |
| 2021 - Jun                               | 15.1%                          | 19.1%              | 58.0%                 | 0.2%            | 26.3%                     |

<sup>a</sup> Opioid use measurement reported from March 2018.
